# Supplementary material for: Microbiome Features Differentiating Unsupervised-Stratification-Based Clusters of Patients with Abnormal Glycometabolism
Source: PubMed Central journal article supplement (PMC9973283; doi:10.1128/mbio.03487-22), 2023-01-18
Supplement: mbio.03487-22-s0001.pdf [file mbio.03487-22-s0001.pdf]

2h-OGTT glucose (mmol/L)

NGT

IFG

IGT

CGI

T2D

HOMA- $\beta$

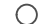

50

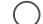

100

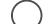

150

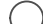

200

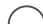

250

4.5 4.8 5.1 5.4

6.0 6.5

11  
10  
9  
8

4.4 4.8 5.2 5.6

10  
9  
8

6.0 6.5 7.0

30  
20  
10

5.0 7.5 10.0 12.5 15.0

Fasting blood glucose (mmol/L)
