# Supplementary material for: Microbiome Features Differentiating Unsupervised-Stratification-Based Clusters of Patients with Abnormal Glycometabolism
Source: PubMed Central journal article supplement (PMC9973283; doi:10.1128/mbio.03487-22), 2023-01-18

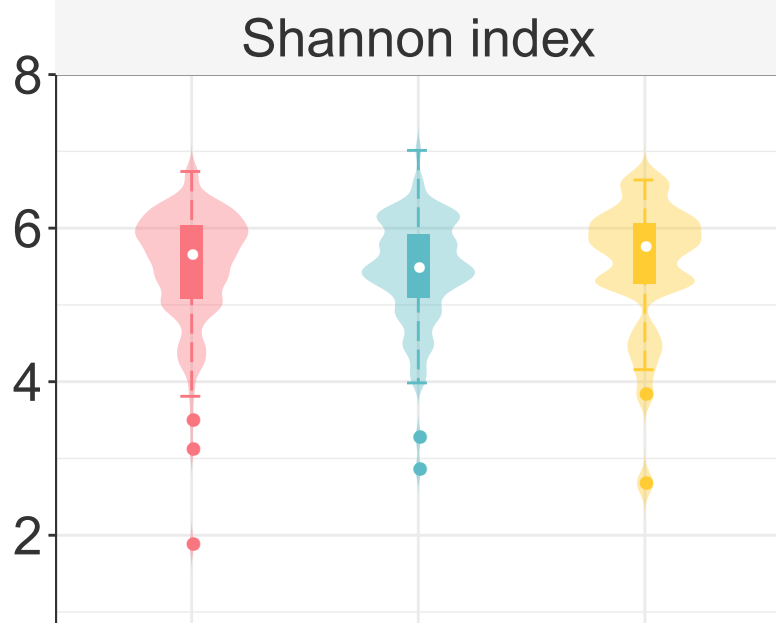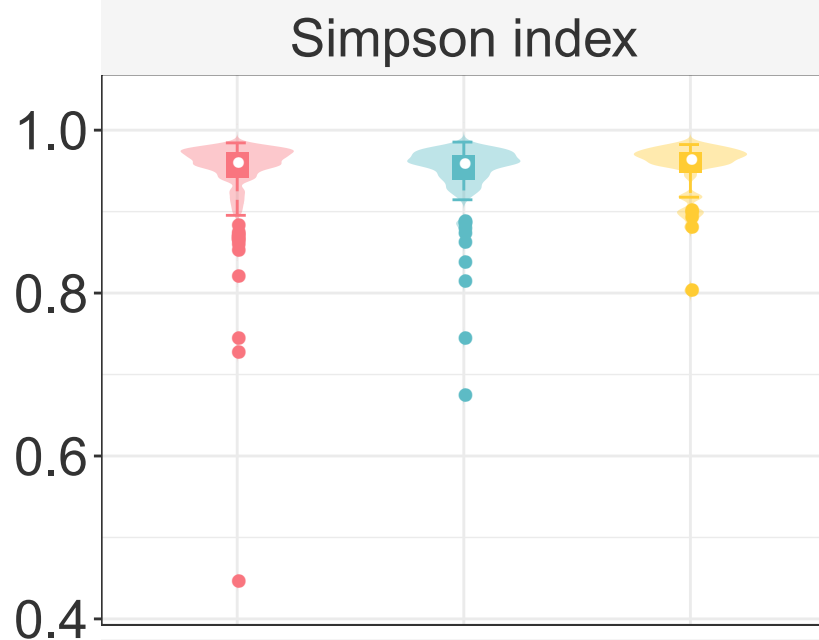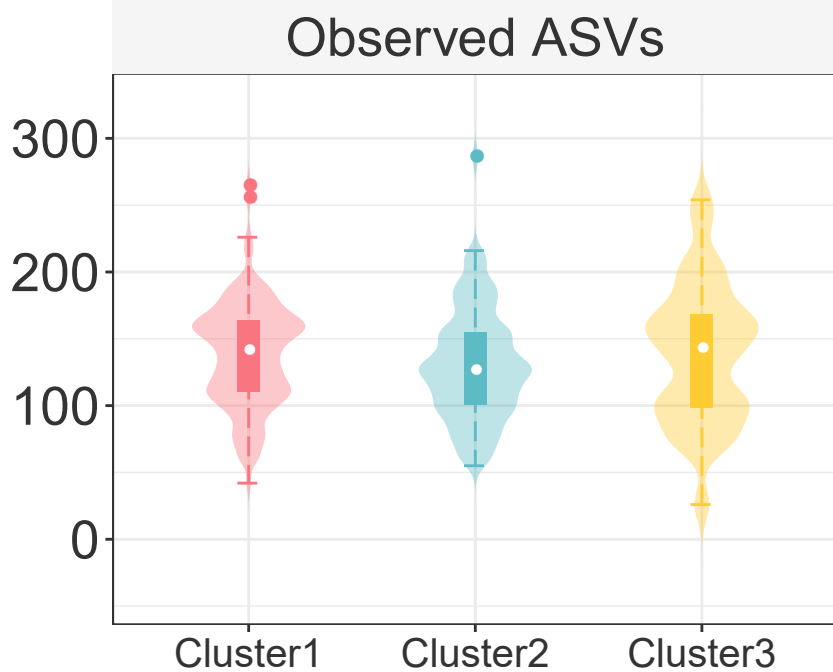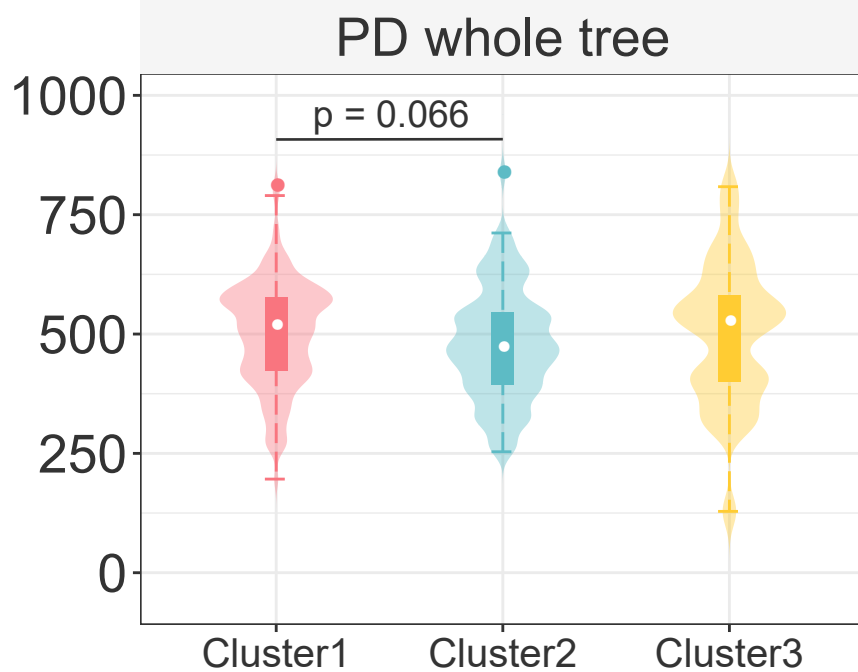

Supplement: mbio.03487-22-s0002.pdf [file mbio.03487-22-s0002.pdf]
